# Supplementary material
Source: HighWire-hosted journal article supplement (http://www.ajnr.org/highwire/filestream/52416/field_highwire_adjunct_files/0/3649_table.pdf)
Supplement: 3649_table.pdf [file 3649_table.pdf]

**Supplemental Table 1: Comparison of CBF (mean mL/100 mg per minute  $\pm$  standard deviation) in patients with NF-1 stratified by the presence of NF-1 spots, optic pathway gliomas, and neurocognitive deficits**

| Structure                     | NF-1 Spots      |             | Optic Pathway Glioma |             | Neurocognitive Deficit |            |
|-------------------------------|-----------------|-------------|----------------------|-------------|------------------------|------------|
|                               | +               | -           | +                    | -           | +                      | -          |
| ACA territory                 |                 |             |                      |             |                        |            |
| Anterior cingulate gyrus      | 60 $\pm$ 5      | 62 $\pm$ 16 | 57 $\pm$ 6           | 62 $\pm$ 8  | 63 $\pm$ 11            | 59 $\pm$ 4 |
|                               | <i>P</i> = .769 |             | <i>P</i> = .454      |             | <i>P</i> = .573        |            |
| Medial frontal cortex         | 55 $\pm$ 7      | 57 $\pm$ 14 | 55 $\pm$ 8           | 56 $\pm$ 9  | 57 $\pm$ 10            | 54 $\pm$ 8 |
|                               | <i>P</i> = .885 |             | <i>P</i> = 1.000     |             | <i>P</i> = 0.852       |            |
| Anterior caudate nucleus      | 50 $\pm$ 4      | 55 $\pm$ 2  | 53 $\pm$ 3           | 50 $\pm$ 4  | 54 $\pm$ 2             | 48 $\pm$ 4 |
|                               | <i>P</i> = .038 |             | <i>P</i> = .374      |             | <i>P</i> = .013        |            |
| ACA-MCA border zone           |                 |             |                      |             |                        |            |
| Centrum semiovale             | 22 $\pm$ 5      | 25 $\pm$ 2  | 26 $\pm$ 3           | 21 $\pm$ 4  | 22 $\pm$ 3             | 23 $\pm$ 5 |
|                               | <i>P</i> = .225 |             | <i>P</i> = .076      |             | <i>P</i> = .950        |            |
| MCA territory                 |                 |             |                      |             |                        |            |
| Frontal operculum             | 60 $\pm$ 8      | 63 $\pm$ 5  | 61 $\pm$ 2           | 60 $\pm$ 9  | 65 $\pm$ 9             | 57 $\pm$ 5 |
|                               | <i>P</i> = .555 |             | <i>P</i> = .839      |             | <i>P</i> = .142        |            |
| Globus pallidus               | 42 $\pm$ 5      | 47 $\pm$ 6  | 48 $\pm$ 4           | 42 $\pm$ 5  | 45 $\pm$ 6             | 42 $\pm$ 6 |
|                               | <i>P</i> = .291 |             | <i>P</i> = .054      |             | <i>P</i> = .228        |            |
| MCA-PCA border zone           |                 |             |                      |             |                        |            |
| Parietal cortex               | 56 $\pm$ 8      | 53 $\pm$ 14 | 55 $\pm$ 12          | 55 $\pm$ 8  | 56 $\pm$ 11            | 55 $\pm$ 8 |
|                               | <i>P</i> = .555 |             | <i>P</i> = .733      |             | <i>P</i> = .852        |            |
| Superomedial temporal cortex  | 59 $\pm$ 9      | 44 $\pm$ 4  | 57 $\pm$ 2           | 61 $\pm$ 10 | 66 $\pm$ 9             | 56 $\pm$ 6 |
|                               | <i>P</i> = .769 |             | <i>P</i> = .635      |             | <i>P</i> = .059        |            |
| Temporo-occipital cortex      | 50 $\pm$ 6      | 54 $\pm$ 13 | 51 $\pm$ 7           | 51 $\pm$ 9  | 54 $\pm$ 9             | 49 $\pm$ 7 |
|                               | <i>P</i> = .885 |             | <i>P</i> = .733      |             | <i>P</i> = .345        |            |
| Anterior choroidal-P-comm-PCA |                 |             |                      |             |                        |            |
| Thalamus                      | 44 $\pm$ 9      | 44 $\pm$ 4  | 40 $\pm$ 3           | 45 $\pm$ 5  | 47 $\pm$ 8             | 41 $\pm$ 7 |
|                               | <i>P</i> = .555 |             | <i>P</i> = .374      |             | <i>P</i> = .181        |            |
| PCA territory                 |                 |             |                      |             |                        |            |
| Posterior cingulate gyrus     | 56 $\pm$ 6      | 61 $\pm$ 12 | 56 $\pm$ 4           | 57 $\pm$ 9  | 62 $\pm$ 8             | 53 $\pm$ 4 |
|                               | <i>P</i> = .555 |             | <i>P</i> = 1.000     |             | <i>P</i> = .020        |            |
| Occipital cortex              | 43 $\pm$ 7      | 53 $\pm$ 18 | 44 $\pm$ 6           | 46 $\pm$ 12 | 50 $\pm$ 14            | 42 $\pm$ 5 |
|                               | <i>P</i> = .368 |             | <i>P</i> = .945      |             | <i>P</i> = .081        |            |

**Note:**—Comparisons by independent-samples Mann-Whitney *U* test with Bonferroni-corrected  $\alpha = 0.004$  for 12 comparisons in each category. ACA indicates anterior cerebral artery; P-comm, posterior communicating; PCA, posterior cerebral artery.
